# Supplementary material
Source: PubMed Central journal article supplement (PMC1955798)

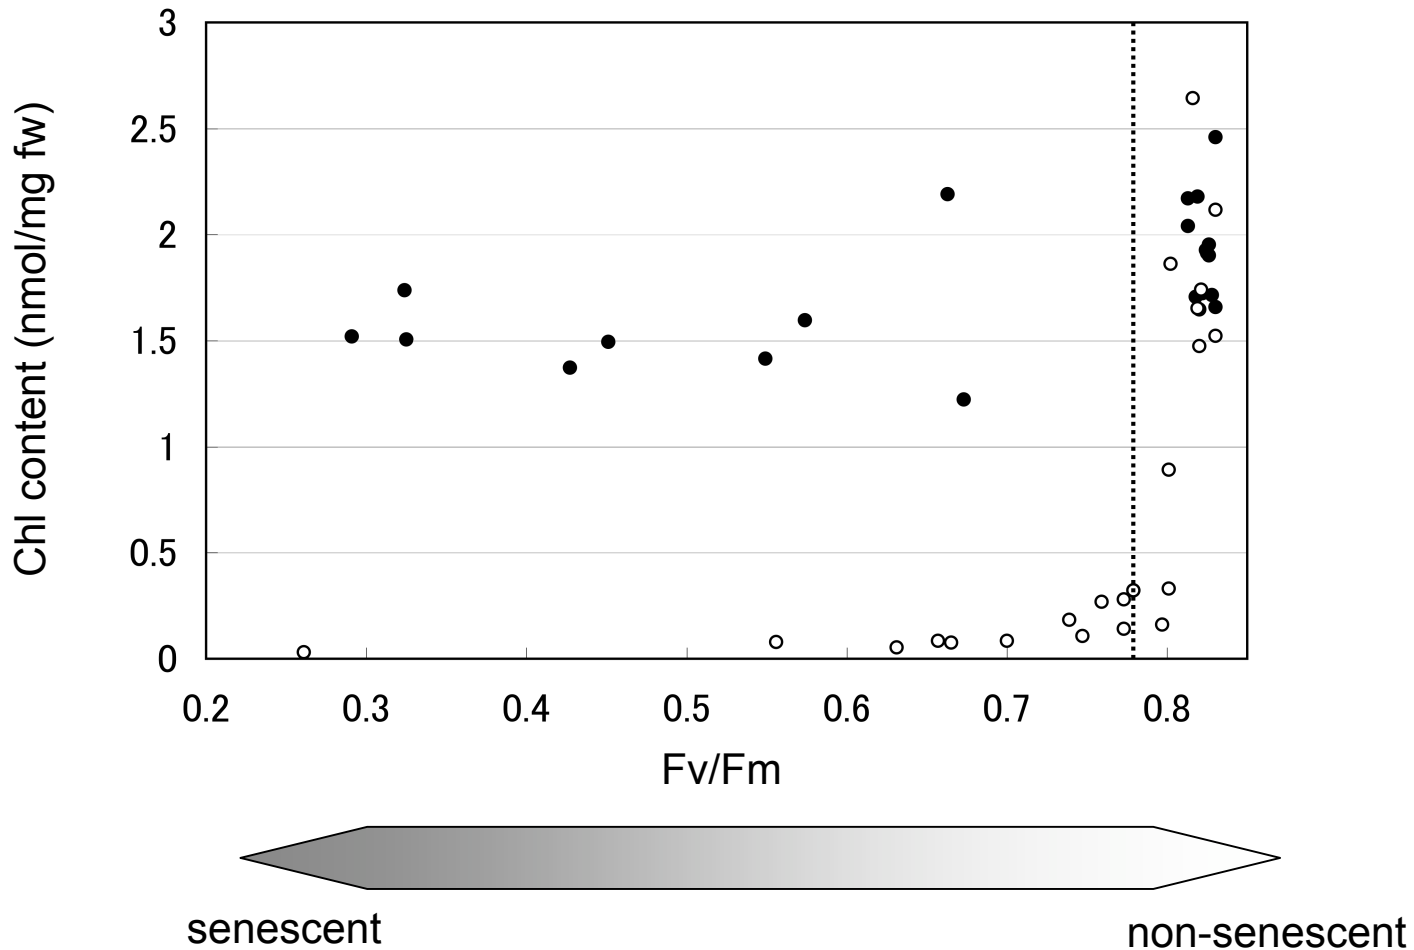

Supplement: pnas_0705521104_1.pdf [file pnas_0705521104_1.pdf]

**A**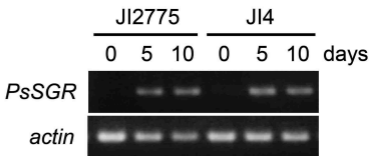**B**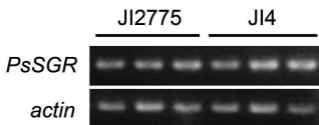**C**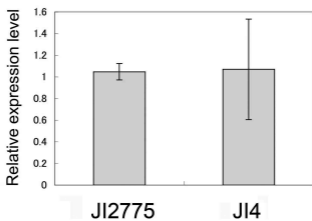**D**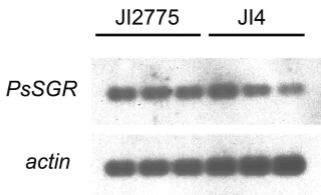

Supplement: pnas_0705521104_3.pdf [file pnas_0705521104_3.pdf]

**GFP****merged****S9-RFP****GFP**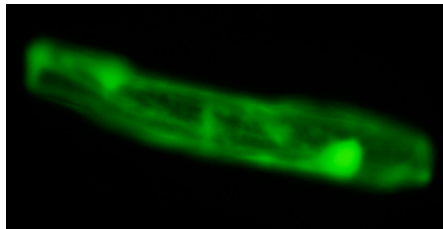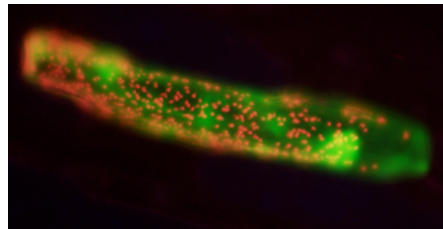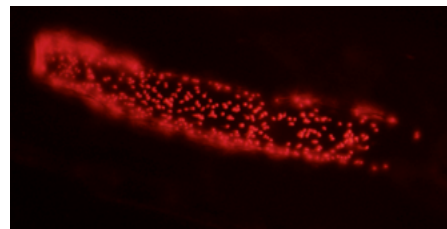**JI4-GFP**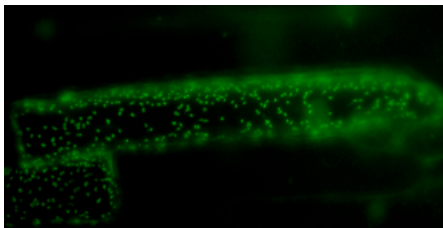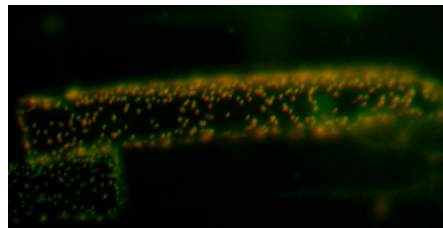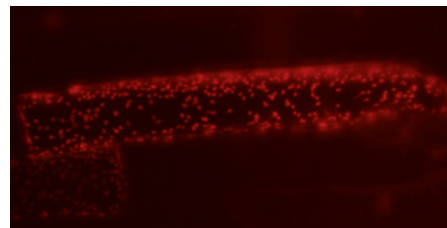**JI2775-GFP**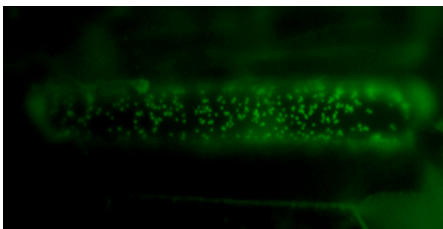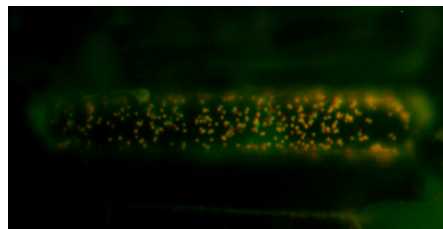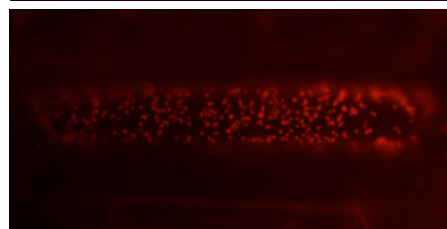

Supplement: pnas_0705521104_4.pdf [file pnas_0705521104_4.pdf]

**A**

WT

*sgr-2*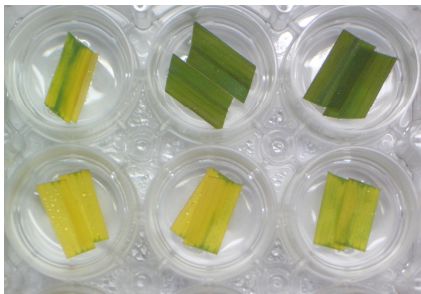

#1

#2

#3

**B***sgr-2*

WT

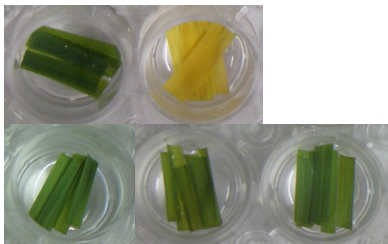

#1

#2

#3

Supplement: pnas_0705521104_5.pdf [file pnas_0705521104_5.pdf]

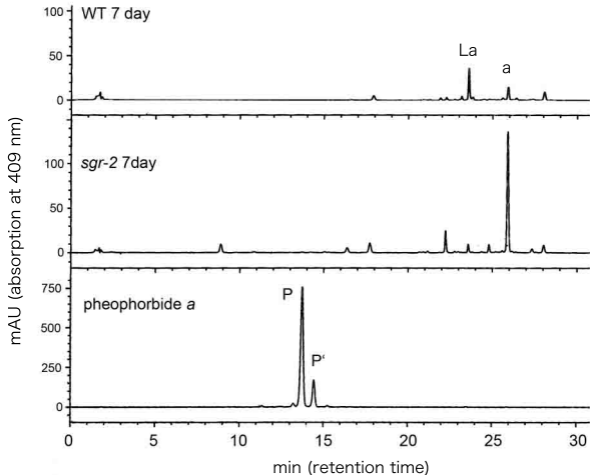

Supplement: pnas_0705521104_6.pdf [file pnas_0705521104_6.pdf]
